# Supplementary material
Source: PubMed Central journal article supplement (PMC3511097)
Supplement: 1213825109_pnas.201213825SI.pdf [file 1213825109_pnas.201213825SI.pdf]

# Supporting Information

Bouazoune and Kingston 10.1073/pnas.1213825109

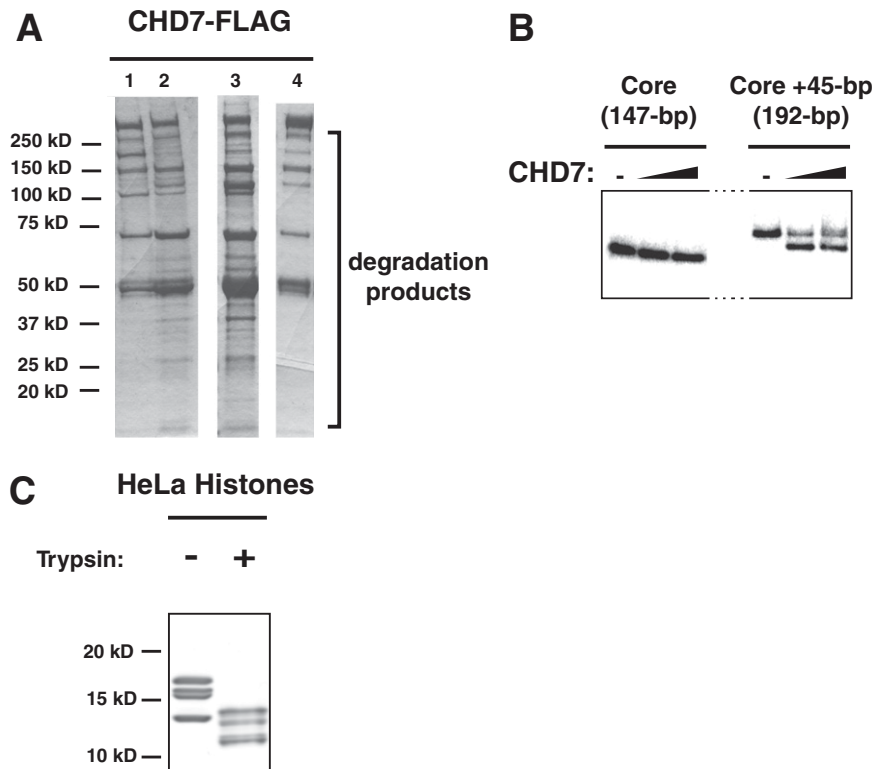

**Fig. S1.** (A) FLAG-tagged CHD7 preparations. Proteins were separated by SDS-PAGE and stained with Coomassie blue. Four independent preparations are shown. (B) CHD7 is unable to remodel nucleosome core particles. 147-bp and 192-bp nucleosome substrates were used in REA assays, as indicated. (C) Native and partially trypsinized (tail-less) histones purified from HeLa cells, and used for nucleosome assemblies. Histones were separated by SDS-PAGE and stained with Coomassie blue.
